# Supplementary material for: Fast, simple and highly specific molecular detection of Vibrio alginolyticus pathogenic strains using a visualized isothermal amplification method
Source: PubMed Central journal article supplement (PMC7057676; doi:10.1186/s12917-020-02297-4), 2020-03-04
Supplement: 12917_2020_2297_MOESM1_ESM.pdf [file 12917_2020_2297_MOESM1_ESM.pdf]

## Supplementary Information

### **Fast, simple and highly specific molecular detection of *Vibrio alginolyticus* pathogenic strains using a visualized isothermal amplification method**

Yu Dong<sup>1,†</sup>, Panpan Zhao<sup>2,†</sup>, Li Chen<sup>1</sup>, Huahua Wu<sup>1</sup>, Xinxin Si<sup>1</sup>, Xin Shen<sup>1</sup>, Hui Shen<sup>3</sup>, Yi Qiao<sup>3</sup>, Shanyuan Zhu<sup>4</sup>, Qiong Chen<sup>5</sup>, Weiwei Jia<sup>1</sup>, Jingquan Dong<sup>1,\*</sup>, Juan Li<sup>5,\*</sup>, Song Gao<sup>6,\*</sup>

<sup>1</sup>Jiangsu Key Laboratory of Marine Biological Resources and Environment, Jiangsu Key Laboratory of Marine Pharmaceutical Compound Screening, Co-Innovation Center of Jiangsu Marine Bio-industry Technology, Jiangsu Ocean University, Lianyungang 222005, China.

<sup>2</sup>Key Laboratory of Zoonosis Research by Ministry of Education, College of Veterinary Medicine, Jilin University, Changchun 130062, China.

<sup>3</sup>Jiangsu Institute of Oceanology and Marine Fisheries, Nantong 226007, China.

<sup>4</sup>Jiangsu Agri-animal Husbandry Vocational College, Taizhou 225300, China.

<sup>5</sup>Wuhan Institute for Food and Cosmetic Control, Wuhan 430000, China.

<sup>6</sup>School of Pharmacy, Jiangsu Ocean University, Lianyungang 222005, China.

<sup>†</sup>These authors contributed equally to this paper.

\*Correspondence Email addresses: [2018000029@jou.edu.cn](mailto:2018000029@jou.edu.cn) (J.D.) / [lijuanice81@163.com](mailto:lijuanice81@163.com) (J.L.) / [gaos@jou.edu.cn](mailto:gaos@jou.edu.cn) (S.G.)



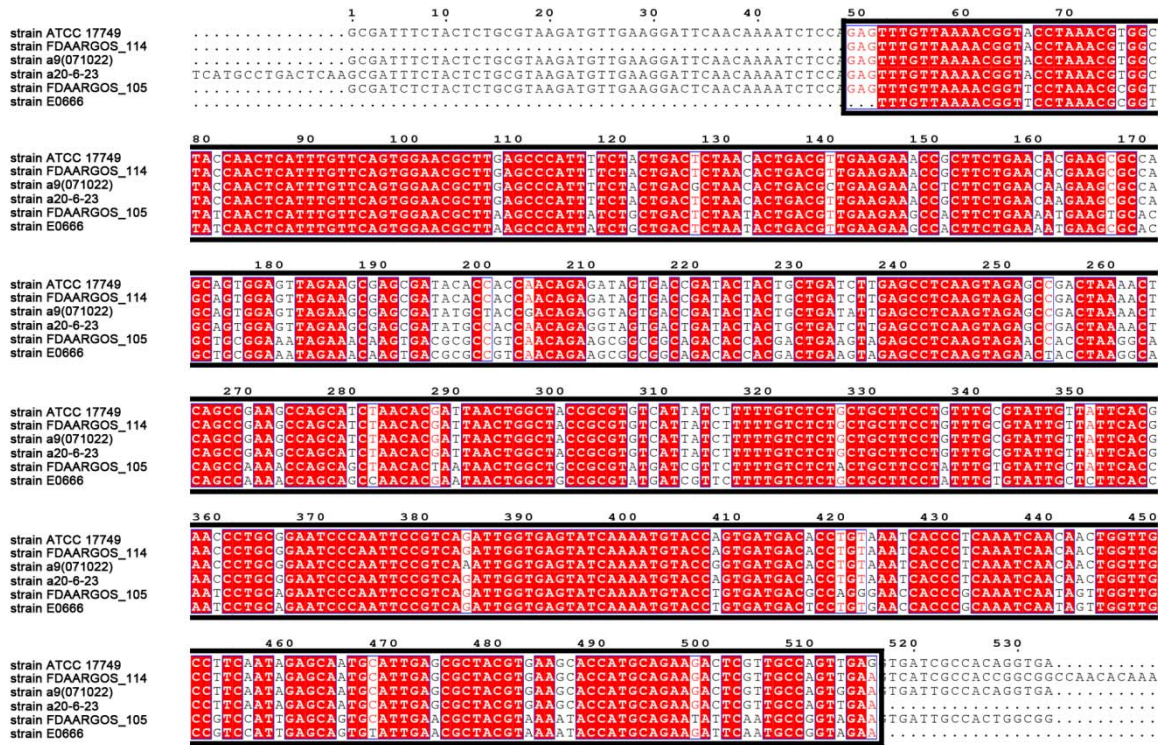

**Fig. S2** Sequence alignment of the *toxR* genes of *V. alginolyticus* pathogenic strains. Information of the corresponding strain is indicated on the left of each sequence. GenBank numbers of the *toxR* genes of the strains are EU155543.1, CP014036.1, AB372531.1, AB372526.1, CP014036.1, and JN188451.1 (from top to bottom). The conserved region is indicated by the black box.

**a**

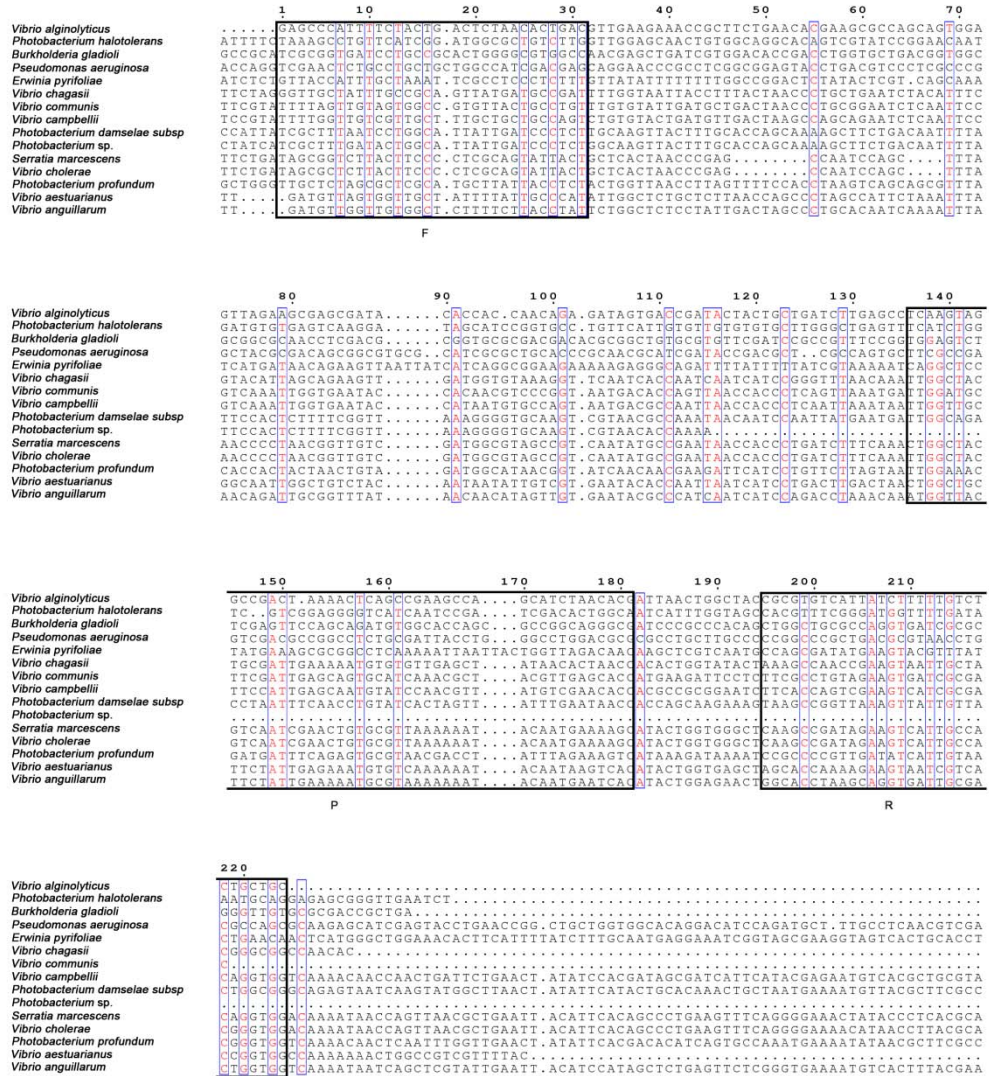

**Fig. S3** Sequences targeted by primer-probe set F2/Probe 2/R in the *toxR* genes of *Vibrio* species and other bacteria. The name of the corresponding species is indicated on the left of each sequence. GenBank numbers of the *toxR* genes of the species are EU155543.1, HQ452616.1, LT797832.1, NC\_002516.2, NC\_012214.1, AY751345.1, JX401922.1, HQ318823.1, KU760757.1, KX280762.1, AF414370.1, MF100077.1, NC\_006370.1, AM183574.1, and AB042547.1 (from top to bottom). The targeted regions by the forward primer (F), the probe (P) and the reverse primer (R) are indicated by the black boxes.



C

*Vibrio alginolyticus*  
*Vibrio parahaemolyticus*  
*Vibrio sp.*  
*Vibrio natrigiens*  
*Vibrio splendidus*  
*Vibrio pomeroiy*  
*Vibrio tasmaniensis*  
*Vibrio mimicus*  
*Vibrio shilonii*  
*Vibrio vulnificus*  
*Vibrio neptunius*

```

1           10           20
..          ..          ..          ..          ..          ..          ..          ..          ..          ..
..AACTCAATGGTACTGTTGAACGCCCTAA.....GCCCACATTTCTACTACTCTAAAC...
..AGTTAACTGTGTTCTAGAACGATTA.....ATCGCTTTCCTCTTTGTTAAC...T
..AATTTATGCAACCGTTGACGCCTGCACCAC..TTTCATCAAATGATCAGC..ACGAGCGGCTAAATTCGAGAAA
..AATTTATGCAACCGTTGACGCCTGCACCAC..TTTCATCAAATGATCAGC..ACGAGCGGCTAAATTCGAGAAA
..AATTTATGCGAAGGTTGAACGTTGACGCCAC..TGTCATCAAATGATCAGC..AGTACAGGTGAAATTCGAGAAA
..AATTTATGCGAAGGTTGAACGTTGACGCCAC..TGTCATCAAATGATCAGC..AGTACAGGTGAAATTCGAGAAA
..AGCTCTTAAAGCTTGAATGGCCCGGT.....TGTTTACCAATAGCCAAAGAAATGAGGTAGCAGAAATGCCACTT
..AGGGGTTAAAGCTTGAATGGCCCGGT..TAG..TGAGCAGTAATACTGCCAGGGAAAGTAAAGCCGCTATCAGAAA
TTGCGAAATTTGATTCAGCTGGATTGCTAAAATAGAATGACGCACAAGGCATCAATAAGTGTAGAGGCGATGATAC

```

F

*Vibrio alginolyticus*  
*Vibrio parahaemolyticus*  
*Vibrio sp.*  
*Vibrio natrigiens*  
*Vibrio splendidus*  
*Vibrio pomeroiy*  
*Vibrio tasmaniensis*  
*Vibrio mimicus*  
*Vibrio shilonii*  
*Vibrio vulnificus*  
*Vibrio neptunius*

```

30           40           50           60           70           80           90
CTGAACTTCTAG...AAACCGCTTTGAACAC...GAAGCGCCACAGTGGAGTTAAGGAGCCATACACCACAA
TTGAACTTGAAG...AGCCAGCTTTGATAACCAATGACGCCTCTCTAATGAGGTAAGCAAGATCAGAGCGCTTT
CAGAACTCTGAG...AGCTAGCTTTAGACGTTGAGCCAGACAAAACAAAAGCCAGGATATTTCCTGACGACCA
CAGAACTCTGAG...AGCTAGCTTTAGACGTTGAGCCAGACAAAACAAAAGCCAGGATATTTCCTGACGACCA
ATGACTTAGAACCTATCTTAGCGTTTGAACACCTGACGCGACTGAAAGAACGATCACCTGAGAGGCTT
GTGACTTAGAGCCGATCTTAACGTTTGAATACCACTTTAGCTGAAAGAACCATCACTTAAACTATGAGCCAAAGCC
ACGACTTGA...TGAGGT...AACTCA...TCAGAAACTTGAATCTCTTTCCAAATC...AACCA
CGACTTTGCC...AAACGGTTCGGTGTCTTTCTTTTGGACTGGTGGGATCACTGGCTCTAGTGGAGAA
TAGCGAGTCGATTTCCCAAGTTGGAGCGAATTTATCCGCACGACATGGCTGGCTGGCTGGTGTGTACACAGGGT
GCTTACCAATTTGATTTACCTGTTGAGGCGCGGTTGGCTCTCTGACTGCCCTTTTCACTGCCGTTTATTCGCCGG

```

*Vibrio alginolyticus*  
*Vibrio parahaemolyticus*  
*Vibrio sp.*  
*Vibrio natrigiens*  
*Vibrio splendidus*  
*Vibrio pomeroiy*  
*Vibrio tasmaniensis*  
*Vibrio mimicus*  
*Vibrio shilonii*  
*Vibrio vulnificus*  
*Vibrio neptunius*

```

100          110          120          130          140          150          160          170
ACA...GATAGTACCCTACTGCTATCTTATGCTCAAGTAGAGCGAATAAACCCAGCCGAAGCCAGCATC
TTG...GACGCTTCTGACCAATCGTTGAACCAAGGCGCCAGTAGTACC..TGAAAAGACACTGTGGCT...TC
GCA...GCCGATCTCCGAACAAAAGTAAAGCACAGTITTCGTAGTGAAAGAGCTCAGGTTACGCCGCAAAA...
GCA...GCCGATCTCCGAACAAAAGTAAAGCACAGTITTCGTAGTGAAAGAGCTCAGGTTACGCCGCAAAA...
ATTAC...AAGTTTCAAGAACCAAGTTAAGTGAACAGCAGCAACAAAGTCGGGCCGGGTTAAG...
GTA...AAAGTTCAAAGAACCAATGCAAGCTGACAGCAGCAGGCTCTGCTCAGACTCCAGTTAAAG...
ATT...AAAGTCTCTAAACTCATATCAAGTAGGCCAATAACCAATAGGCTAAGCTTAAACTGAAAG...
ATTG...ACGCTTATCGAAC...TCGAC...AGAACAGCGACTCTCAAGAGTACCACTAAGC...
GTTAA...CCGAGGTTTGGCTTTCGAGTTCTTGGAAATCAGACAGAGGCTTCGTTATGGCTCTGA...
GATTAAGGCACCTTCTTATTCGCGTATTCATGACAGATTCCTGGCTGAGAGATGTATGACGACTTCGCTT...TC
TGTAA...TTCCGGTTCATTTCTTGTAGCTTCTCTTCAGATTCCTCTGAAACGCTTTTITTTGAAAGTGTCTC...

```

P

*Vibrio alginolyticus*  
*Vibrio parahaemolyticus*  
*Vibrio sp.*  
*Vibrio natrigiens*  
*Vibrio splendidus*  
*Vibrio pomeroiy*  
*Vibrio tasmaniensis*  
*Vibrio mimicus*  
*Vibrio shilonii*  
*Vibrio vulnificus*  
*Vibrio neptunius*

```

180          190          200          210          220
TAACATCTTACTGGCTACGCGTGTCTATCTTTTGTTCCTGGCG...
TGCTGGTAATCATGGATTCACGGCTTATTTATTTTGGACATTACTAAGATTTGCTACTCTGTATGAAAC
GAAACCAATATGGTTGACACGGCTGATTTATTTGGTAGTATATGTTTCAGTTGGCTACTACTATTCAGGAA
GAAACCAATATGGTTGACACGGCTGATTTATTTGGTAGTATATGTTTCAGTTGGCTACTACTATTCAGGAA
...CAATATAGTGGTTAGGTTTCTGTTATGCTTGGGTTTCACTGCAATCTGTTTACATTTAATAAC
...CAATATAGTGGTTAGGTTTCTGTTATGCTTGGGTTTCACTGCAATCTGTTTACATTTAATAAC
...CTGGATTAATGGTTAAAGTTTGGAAAGTGGTTGGTTGGCTTTCCCTGCAATTTCAATTTAAGCGTAAAGAGCC
...GATTAATAGTGGGGATCTGGCTGATTTTGTGATCGGATGTTGATTCGTTAGCGTATGTTTAACTAACT
...TGAGCGCAGGCAAGAGCGGCTCAACTAGATATTAAGCTGATAGCC...GCITAGCAGCCCTCTTTAAGAA
CGGAGTTCTTCTTCAAGCGTTTCCAGTGGGCTGATTTGGTAAAG...GTTTCCAGCCTTTTGAAGTAT
ACCACCTCATATGGCTTTCGGCTCAACATACAGAGAGGCTGATAGCC...GTTTTCAGCCTTTTGAATAT

```

R

**Fig. S3 (continued)** Sequences targeted by primer-probe set F2/Probe 2/R in the *toxR* genes of *Vibrio* species and other bacteria. GenBank numbers of the *toxR* genes of the species are EU155543.1, EU155587.1, NC\_016613.1, FM999823.1, AY751344.1, AY751342.1, AY751343.1, AF170881.1, EU727208.1, KF322110.1, and HQ452617.1 (from top to bottom).

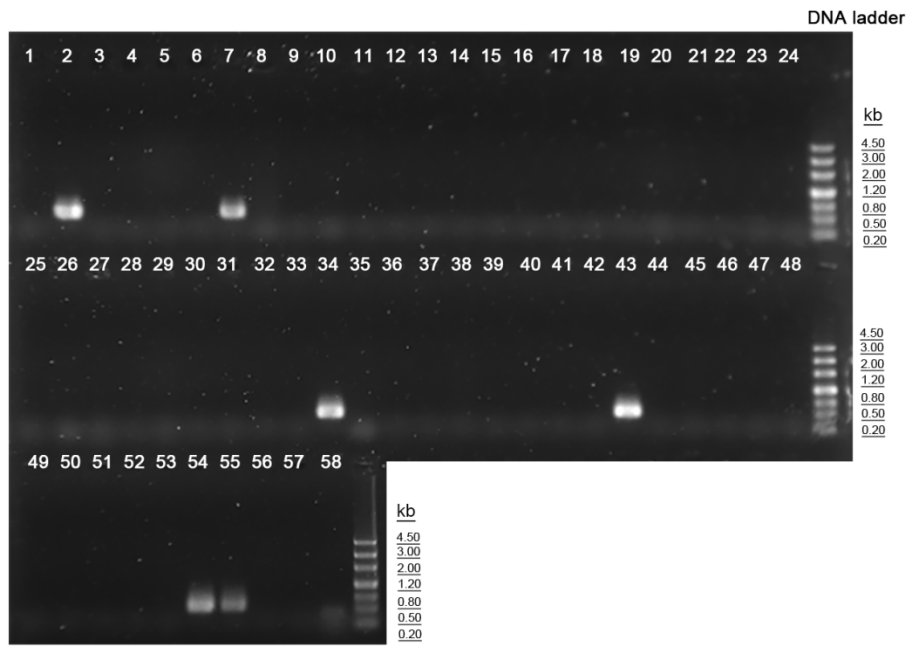

**Fig. S4** Agarose gel image of the PCR detection of *V. alginolyticus* in shrimp samples. Sample numbers are indicated on the wells of the gel. The DNA ladder was run in the last lane of each row. The band sizes of the DNA ladder are shown on the right of each row.

**Table S1** Strain information of bacteria used in this study and RPA-LFD detection results

| Species                         | Source               | strain             | RPA-LFD detection results |
|---------------------------------|----------------------|--------------------|---------------------------|
| <i>Vibrio alginolyticus</i>     | Reference strain     | ATCC 17749         | + (positive)              |
| <i>V. alginolyticus</i>         | Environmental strain | Nantong, China     | +                         |
| <i>V. alginolyticus</i>         | Environmental strain | Nantong, China     | +                         |
| <i>V. alginolyticus</i>         | Environmental strain | Nantong, China     | +                         |
| <i>V. alginolyticus</i>         | Environmental strain | Nantong, China     | +                         |
| <i>V. alginolyticus</i>         | Environmental strain | Nantong, China     | +                         |
| <i>V. alginolyticus</i>         | Environmental strain | Lianyungang, China | +                         |
| <i>V. parahaemolyticus</i>      | Reference strain     | ATCC 17802         | - (negative)              |
| <i>V. anguillarum</i>           | Reference strain     | ATCC 19264         | -                         |
| <i>V. vulnificus</i>            | Reference strain     | ATCC 27562         | -                         |
| <i>V. harveyi</i>               | Reference strain     | ATCC 43516         | -                         |
| <i>V. mediterranei</i>          | Reference strain     | ATCC 43341         | -                         |
| <i>V. shilonii</i>              | Reference strain     | ATCC BAA-91        | -                         |
| <i>V. cholera</i>               | Reference strain     | ATCC 14100         | -                         |
| <i>V. fischeri</i>              | Reference strain     | ATCC 700601D       | -                         |
| <i>V. azureus</i>               | Reference strain     | MCCC 1A06651       | -                         |
| <i>V. ichthyenteri</i>          | Reference strain     | MCCC 1A00057       | -                         |
| <i>V. mimicus</i>               | Reference strain     | MCCC 1A02602       | -                         |
| <i>V. splendidus</i>            | Reference strain     | MCCC 1A04096       | -                         |
| <i>V. campbellii</i>            | Reference strain     | MCCC 1A02605       | -                         |
| <i>V. chagasii</i>              | Reference strain     | MCCC 1B00386       | -                         |
| <i>V. fluvialis</i>             | Reference strain     | MCCC 1A02761       | -                         |
| <i>V. natriegens</i>            | Reference strain     | MCCC 1D00129       | -                         |
| <i>Vibrio</i> sp.               | Reference strain     | MCCC 1A00047       | -                         |
| <i>V. ponticus</i>              | Reference strain     | MCCC 1H00061       | -                         |
| <i>V. rotiferianus</i>          | Reference strain     | MCCC 1B00068       | -                         |
| <i>V. diabolicus</i>            | Reference strain     | MCCC 1D00126       | -                         |
| <i>Listeria monocytogenes</i>   | Reference strain     | ATCC 19115         | -                         |
| <i>Staphylococcus aureus</i>    | Reference strain     | ATCC 6538          | -                         |
| <i>Escherichia coli</i> O157:H7 | Reference strain     | ATCC 43888         | -                         |
| <i>Bacillus cereus</i>          | Reference strain     | ATCC 14579         | -                         |
| <i>S. typhimurium</i>           | Reference strain     | ATCC 14028         | -                         |
| <i>B. subtilis</i>              | Reference strain     | ATCC 6051          | -                         |
| <i>Aeromonas veronii</i>        | Reference strain     | MCCC 1A00180       | -                         |
| <i>Citrobacter freundii</i>     | Reference strain     | MCCC 1A00198       | -                         |
| <i>Leuconostoc lactis</i>       | Reference strain     | MCCC 1A07814       | -                         |
| <i>B. amyloliquefaciens</i>     | Reference strain     | ATCC 23842         | -                         |
| <i>A. hydrophila</i>            | Reference strain     | MCCC 1A00007       | -                         |
| <i>A. allosaccharophila</i>     | Reference strain     | ATCC 51208         | -                         |
| <i>Bacillus</i> sp.             | Reference strain     | MCCC 1A00006       | -                         |
| <i>Clostridium butyricum</i>    | Reference strain     | ATCC 3627          | -                         |
